# Supplementary material
Source: MDPI journal article supplement (https://www.mdpi.com/2072-4292/12/13/2172)
Supplement: s1 [file s1]

## Proofread document: changes made

Dear copy-editors, please find attached the list of changes made in the main document. All major changes are tracked in the main manuscript. Minor changes pointed by the editors were addressed in the manuscript. Your suggested changes made the manuscript better.

### Header:

- Changes on affiliation for co-author 3. An acronym in the affiliation was missing.
- Changes in the co-authors 4 email.

### Introduction:

- Paragraph 126: changed word 'applied' to 'used'
- 

### Methods section:

- Dots between g and m are multiplier dots.
- Figure 2: Removed 'used here' from figure caption
- Add the MATLAB script URL to the figure 2 description
- Since figures and tables cannot be directly followed by title, we provided a short sentence addressing figure 2.
- Table 3: Unitless cells were replaced by '-' to make table clearer and adapted units
- Added an explanation for  $P^{50th}$  on equation 13
- Clarified the sentence about table 6 in the Nechad10 section (row 425)

### Results section:

- Re-adapted paragraphs order in the first paragraphs of results section.
- Figure 3 is mentioned before figure 5 (this figure 5 was changed to figure 4)
- What was the 3<sup>rd</sup> and 4<sup>th</sup> paragraph in the results section was referring to figure 4 so authors moved them down below table 7.
- Rearranged the sentence in row 540 about uncertainty estimates
- Table 8 (row 606): New River, SC is corrected to New River, NC

### Discussion section:

- Clarified sentence in row 660

### References:

- Add publisher location for reference [40]
- Fixed reference [21]
- Changed reference [22] as indicated by the platform PANGAEA

Thank you!
